# Supplementary material for: Evaluating Geospatial Sampling Frames with a Novel Field Census for a Malaria Household Survey in Artibonite, Haiti
Source: PubMed Central journal article supplement (PMC11448545; doi:10.4269/ajtmh.23-0891), 2024-08-13
Supplement: tpmd230891.SD1.pdf [file tpmd230891.SD1.pdf]

1 **Supplementary Table 1.** Summary of sampling frame methodologies.

| #  | Sampling Frame Method                                                                                                                                                                                                                                                                     | Quality                                                                                                                                            | Disadvantages                                                                                                                                                      |
|----|-------------------------------------------------------------------------------------------------------------------------------------------------------------------------------------------------------------------------------------------------------------------------------------------|----------------------------------------------------------------------------------------------------------------------------------------------------|--------------------------------------------------------------------------------------------------------------------------------------------------------------------|
| 1. | Household Census: <ul style="list-style-type: none"> <li>• Map and list every HH in selected area.</li> <li>• Select a simple random sample from HH list.</li> </ul>                                                                                                                      | Gold Standard high quality data                                                                                                                    | Costly: in terms of time and personnel                                                                                                                             |
| 2. | LandScan™ Population: <ul style="list-style-type: none"> <li>• Use population counts and recent DHS to estimate # of HHs</li> <li>• Select grid based on estimated # of HHs</li> </ul>                                                                                                    | LandScan™ data is updated yearly and is available worldwide.                                                                                       | Does not address field level of how to select specific HHs. Produces 1 value per grid cell; survey team must still identify HHs and select.                        |
| 3. | Digitization method: <ul style="list-style-type: none"> <li>• Use high resolution imagery to manually digitize all structures (add a point) &gt;3 m<sup>2</sup></li> <li>• Use past surveys to estimate proportion of structures that are HHs. Use DHS to calculate population</li> </ul> | Unknown – medium<br><br>This is what is under evaluation for the future (to reduce cost and save time)                                             | Requires imagery which has a cost to acquire. Requires advance time and training to digitize structures. If known, method assisted by % of structures that are HHs |
| 4. | Census enumeration areas: <ul style="list-style-type: none"> <li>• Total population, number of structures, and number of HHs per small area</li> <li>• Select EAs, then multiple ways to select HHs (census and simple random sample; skipping interval; segmentation)</li> </ul>         | Variable – reliability decreases with age of census. Error may be introduced by teams during HH selection.<br><br>This is what most people do now. | Census enumeration area limits often available at a cost or not digitally. Relies often on data 10+ years old.                                                     |
